# Supplementary material for: TbIII/3d–TbIII clusters derived from a 1,4,7-triazacyclononane-based hexadentate ligand with field-induced slow magnetic relaxation and oxygen-sensitive luminescence
Source: Royal Society of Chemistry journal article supplement (doi:10.1039/c8nj05777j), 2019-01-01
Supplement: c8nj05777j1.pdf [file c8nj05777j1.pdf]

## ***Electronic Supplementary Information (ESI)***

### **Tb<sup>III</sup>/3d–Tb<sup>III</sup> clusters derived from 1,4,7– triazacyclononane-based hexadentate ligand with field- induced slow magnetic relaxation and oxygen-sensitive luminescence**

He-Rui Wen,<sup>a\*</sup> Jia-Li Zhang,<sup>a</sup> Fu-Yong Liang,<sup>a</sup> KaiYang,<sup>a</sup> Sui-Jun Liu,<sup>a\*</sup> Jin-Sheng Liao<sup>a</sup> and  
Cai-Ming Liu<sup>b</sup>

<sup>a</sup>*School of Metallurgical and Chemical Engineering, Jiangxi University of Science  
and Technology, Ganzhou, 341000, China.*

<sup>b</sup>*Beijing National Laboratory for Molecular Sciences, Center for Molecular Science,  
Institute of Chemistry, Chinese Academy of Sciences, Beijing 100190, P.R. China*

*E-mail: wenherui63@163.com (H.-R. Wen), liusuijun147@163.com (S.-J. Liu)*

**Table S1.** Selected bond lengths(Å) and angles(deg) for **1**

|           |            |           |           |
|-----------|------------|-----------|-----------|
| Tb1—O3    | 2.172(2)   | Tb1—N2    | 2.542(3)  |
| Tb1—O4    | 2.181(2)   | Tb1—N3    | 2.553(3)  |
| Tb1—O2    | 2.188(2)   | Tb1—N1    | 2.564(2)  |
| Tb1—O1    | 2.470(3)   |           |           |
| O3—Tb1—O4 | 112.80(8)  | O3—Tb1—O1 | 80.55(10) |
| O3—Tb1—O2 | 117.44(9)  | O4—Tb1—O1 | 82.71(9)  |
| O4—Tb1—O2 | 118.86(8)  | O2—Tb1—O1 | 73.73(9)  |
| O4—Tb1—N2 | 87.16(8)   | O3—Tb1—N2 | 141.13(8) |
| O2—Tb1—N2 | 74.95(8)   | N2—Tb1—N3 | 69.09(8)  |
| O1—Tb1—N2 | 136.82(9)  | O3—Tb1—N1 | 83.50(8)  |
| O3—Tb1—N3 | 75.62(8)   | O4—Tb1—N1 | 75.70(8)  |
| O4—Tb1—N3 | 142.17(8)  | O2—Tb1—N1 | 140.44(8) |
| O2—Tb1—N3 | 83.90(8)   | O1—Tb1—N1 | 145.58(9) |
| O1—Tb1—N3 | 134.69(10) | N2—Tb1—N1 | 69.04(8)  |
| N3—Tb1—N1 | 68.56(8)   |           |           |

**Table S2.** Selected bond lengths(Å) and angles(deg) for **2**

|                                                                                                                                                  |             |                                          |           |
|--------------------------------------------------------------------------------------------------------------------------------------------------|-------------|------------------------------------------|-----------|
| Tb1—O1 <sup>#1</sup>                                                                                                                             | 2.171 (5)   | Tb1—N1 <sup>#1</sup>                     | 2.509 (7) |
| Tb1—O1                                                                                                                                           | 2.171 (5)   | Tb1—N1                                   | 2.509 (7) |
| Tb1—O1 <sup>#2</sup>                                                                                                                             | 2.171 (5)   | Tb1—O1W <sup>#2</sup>                    | 2.58 (7)  |
| Tb1—O1W <sup>#3</sup>                                                                                                                            | 2.37 (7)    | Tb1—O1W <sup>#1</sup>                    | 2.58 (7)  |
| Tb1—O1W <sup>#4</sup>                                                                                                                            | 2.37 (7)    | Tb1—O1W                                  | 2.58 (7)  |
| Tb1—O1W <sup>#5</sup>                                                                                                                            | 2.37 (7)    | O1W—Tb1 <sup>#3</sup>                    | 2.37 (7)  |
| Tb1—N1 <sup>#2</sup>                                                                                                                             | 2.509 (7)   |                                          |           |
| O1 <sup>#1</sup> —Tb1—O1                                                                                                                         | 114.85 (13) | O1 <sup>#2</sup> —Tb1—O1W <sup>#4</sup>  | 77 (4)    |
| O1 <sup>#1</sup> —Tb1—O1 <sup>#2</sup>                                                                                                           | 114.84 (13) | O1W <sup>#3</sup> —Tb1—O1W <sup>#4</sup> | 25.4 (13) |
| O1—Tb1—O1 <sup>#2</sup>                                                                                                                          | 114.85 (13) | O1 <sup>#1</sup> —Tb1—O1W <sup>#5</sup>  | 89 (2)    |
| O1 <sup>#1</sup> —Tb1—O1W <sup>#3</sup>                                                                                                          | 77 (4)      | O1—Tb1—O1W <sup>#5</sup>                 | 77 (4)    |
| O1—Tb1—O1W <sup>#3</sup>                                                                                                                         | 64 (2)      | O1 <sup>#2</sup> —Tb1—O1W <sup>#5</sup>  | 64 (2)    |
| O1 <sup>#2</sup> —Tb1—O1W <sup>#3</sup>                                                                                                          | 89 (2)      | O1W <sup>#3</sup> —Tb1—O1W <sup>#5</sup> | 25.4 (13) |
| O1 <sup>#1</sup> —Tb1—O1W <sup>#4</sup>                                                                                                          | 64 (2)      | O1W <sup>#4</sup> —Tb1—O1W <sup>#5</sup> | 25.4 (13) |
| O1—Tb1—O1W <sup>#4</sup>                                                                                                                         | 89 (2)      |                                          |           |
| O1 <sup>#1</sup> —Tb1—N1 <sup>#2</sup>                                                                                                           | 144.5 (2)   | N1 <sup>#1</sup> —Tb1—N1                 | 70.5 (3)  |
| O1—Tb1—N1 <sup>#2</sup>                                                                                                                          | 86.0 (2)    | O1 <sup>#1</sup> —Tb1—O1W <sup>#2</sup>  | 65 (2)    |
| O1 <sup>#2</sup> —Tb1—N1 <sup>#2</sup>                                                                                                           | 76.8 (2)    | O1—Tb1—O1W <sup>#2</sup>                 | 77 (4)    |
| O1W <sup>#3</sup> —Tb1—N1 <sup>#2</sup>                                                                                                          | 138 (4)     | O1 <sup>#2</sup> —Tb1—O1W <sup>#2</sup>  | 88 (2)    |
| O1W <sup>#4</sup> —Tb1—N1 <sup>#2</sup>                                                                                                          | 149 (3)     | O1W <sup>#3</sup> —Tb1—O1W <sup>#2</sup> | 14.0 (6)  |
| O1W <sup>#5</sup> —Tb1—N1 <sup>#2</sup>                                                                                                          | 124.4 (15)  | O1W <sup>#4</sup> —Tb1—O1W <sup>#2</sup> | 14.0 (6)  |
| O1 <sup>#1</sup> —Tb1—N1 <sup>#1</sup>                                                                                                           | 76.8 (2)    | O1W <sup>#5</sup> —Tb1—O1W <sup>#2</sup> | 28.2 (13) |
| O1—Tb1—N1 <sup>#1</sup>                                                                                                                          | 144.5 (2)   | N1 <sup>#2</sup> —Tb1—O1W <sup>#2</sup>  | 150 (2)   |
| O1 <sup>#2</sup> —Tb1—N1 <sup>#1</sup>                                                                                                           | 86.0 (2)    | N1 <sup>#1</sup> —Tb1—O1W <sup>#2</sup>  | 135 (4)   |
| O1W <sup>#3</sup> —Tb1—N1 <sup>#1</sup>                                                                                                          | 149 (3)     | N1—Tb1—O1W <sup>#2</sup>                 | 127 (2)   |
| O1W <sup>#4</sup> —Tb1—N1 <sup>#1</sup>                                                                                                          | 124.4 (15)  | O1 <sup>#1</sup> —Tb1—O1W <sup>#1</sup>  | 88 (2)    |
| O1W <sup>#5</sup> —Tb1—N1 <sup>#1</sup>                                                                                                          | 138 (4)     | O1—Tb1—O1W <sup>#1</sup>                 | 65 (2)    |
| N1 <sup>#2</sup> —Tb1—N1 <sup>#1</sup>                                                                                                           | 70.5 (3)    | O1 <sup>#2</sup> —Tb1—O1W <sup>#1</sup>  | 77 (4)    |
| O1 <sup>#1</sup> —Tb1—N1                                                                                                                         | 86.0 (2)    | O1W <sup>#3</sup> —Tb1—O1W <sup>#1</sup> | 14.0 (6)  |
| O1—Tb1—N1                                                                                                                                        | 76.8 (2)    | O1W <sup>#4</sup> —Tb1—O1W <sup>#1</sup> | 28.2 (13) |
| O1 <sup>#2</sup> —Tb1—N1                                                                                                                         | 144.5 (2)   | O1W <sup>#5</sup> —Tb1—O1W <sup>#1</sup> | 14.0 (6)  |
| O1W <sup>#3</sup> —Tb1—N1                                                                                                                        | 124.4 (14)  | N1 <sup>#2</sup> —Tb1—O1W <sup>#1</sup>  | 127 (2)   |
| O1W <sup>#4</sup> —Tb1—N1                                                                                                                        | 138 (4)     | N1 <sup>#1</sup> —Tb1—O1W <sup>#1</sup>  | 150 (2)   |
| O1W <sup>#5</sup> —Tb1—N1                                                                                                                        | 149 (3)     | N1—Tb1—O1W <sup>#1</sup>                 | 135 (4)   |
| N1 <sup>#2</sup> —Tb1—N1                                                                                                                         | 70.5 (3)    |                                          |           |
| O1W <sup>#2</sup> —Tb1—O1W <sup>#1</sup>                                                                                                         | 23.3 (14)   | O1W <sup>#5</sup> —Tb1—O1W               | 14.0 (6)  |
| O1 <sup>#1</sup> —Tb1—O1W                                                                                                                        | 77 (4)      | N1 <sup>#2</sup> —Tb1—O1W                | 135 (4)   |
| O1—Tb1—O1W                                                                                                                                       | 88 (2)      | N1 <sup>#1</sup> —Tb1—O1W                | 127 (2)   |
| O1 <sup>#2</sup> —Tb1—O1W                                                                                                                        | 65 (2)      | N1—Tb1—O1W                               | 150 (2)   |
| O1W <sup>#3</sup> —Tb1—O1W                                                                                                                       | 28.2 (13)   | O1W <sup>#2</sup> —Tb1—O1W               | 23.3 (14) |
| O1W <sup>#4</sup> —Tb1—O1W                                                                                                                       | 14.0 (6)    | O1W <sup>#1</sup> —Tb1—O1W               | 23.3 (14) |
| Symmetry codes: (#1) -x+y, -x+1, z; (#2) -y+1, x-y+1, z; (#3) -x+2/3, -y+4/3, -z+1/3; (#4) x-y+2/3, x+1/3, -z+1/3; (#5) y-1/3, -x+y+1/3, -z+1/3. |             |                                          |           |

**Table S3.** Selected bond lengths(Å) and angles(deg) for **3**

|                                        |            |                                        |            |
|----------------------------------------|------------|----------------------------------------|------------|
| Tb1—O3                                 | 2.250(4)   | Zn1—N2                                 | 2.111(7)   |
| Tb1—O1                                 | 2.292(5)   | Zn1—N1                                 | 2.124(6)   |
| Tb1—O2                                 | 2.281(5)   | Zn1—N3                                 | 2.129(5)   |
| Zn1—O1                                 | 2.170(5)   | Zn1—O2                                 | 2.136(5)   |
| Zn1—O3                                 | 2.145(5)   |                                        |            |
| O3—Tb1—O3 <sup>#1</sup>                | 180.0(3)   | O3—Tb1—O2                              | 76.34(16)  |
| O3—Tb1—O1 <sup>#1</sup>                | 103.60(17) | O3 <sup>#1</sup> —Tb1—O2               | 103.66(16) |
| O3 <sup>#1</sup> —Tb1—O1 <sup>#1</sup> | 76.40(17)  | O1 <sup>#1</sup> —Tb1—O2               | 104.59(19) |
| O3—Tb1—O1                              | 76.40(17)  | O1—Tb1—O2                              | 75.41(19)  |
| O3 <sup>#1</sup> —Tb1—O1               | 103.60(17) | O3—Tb1—O2 <sup>#1</sup>                | 103.66(16) |
| O1 <sup>#1</sup> —Tb1—O1               | 180.0(2)   | O3 <sup>#1</sup> —Tb1—O2 <sup>#1</sup> | 76.34(16)  |
| O1—Tb1—O2 <sup>#1</sup>                | 104.59(19) | O1 <sup>#1</sup> —Tb1—O2 <sup>#1</sup> | 75.41(19)  |
| O2—Tb1—O2 <sup>#1</sup>                | 180.000(1) | N2—Zn1—N1                              | 84.6(2)    |
| N2—Zn1—O2                              | 90.8(2)    | N2—Zn1—N3                              | 83.5(2)    |
| N1—Zn1—O2                              | 105.0(2)   | N1—Zn1—N3                              | 83.3(2)    |
| N2—Zn1—O3                              | 104.9(2)   | N3—Zn1—O2                              | 169.5(2)   |
| N3—Zn1—O3                              | 91.2(2)    | N1—Zn1—O3                              | 168.5(2)   |
| O2—Zn1—O3                              | 81.72(18)  | Zn1—O1—Tb1                             | 84.95(19)  |
| N2—Zn1—O1                              | 169.08(18) | Zn1—O3—Tb1                             | 86.59(15)  |
| N1—Zn1—O1                              | 90.5(2)    | Zn2—O5—Tb2                             | 85.4(2)    |
| N3—Zn1—O1                              | 105.6(2)   | Zn2—O4—Tb2                             | 85.9(2)    |
| O2—Zn1—O1                              | 81.00(19)  | Zn2—O6—Tb2                             | 85.92(16)  |
| O3—Zn1—O1                              | 81.23(19)  | Zn1—O2—Tb1                             | 86.03(18)  |
| O4—Tb2—O4 <sup>#2</sup>                | 180.00(8)  | N5—Zn2—O6                              | 104.5(2)   |
| O4—Tb2—O6                              | 75.51(18)  | N4—Zn2—O6                              | 169.7(3)   |
| O4 <sup>#2</sup> —Tb2—O6               | 104.49(18) | O5—Zn2—O6                              | 81.6(2)    |
| O4—Tb2—O6 <sup>#2</sup>                | 104.49(18) | N6—Zn2—O4                              | 103.3(2)   |
| O4 <sup>#2</sup> —Tb2—O6 <sup>#2</sup> | 75.51(18)  | N5—Zn2—O4                              | 171.3(2)   |
| O6—Tb2—O6 <sup>#2</sup>                | 180.000(1) | N4—Zn2—O4                              | 90.2(2)    |
| O4—Tb2—O5                              | 76.4(2)    | O5—Zn2—O4                              | 82.5(2)    |
| O4 <sup>#2</sup> —Tb2—O5               | 103.6(2)   | O6—Zn2—O4                              | 80.91(19)  |
| O6—Tb2—O5                              | 75.76(19)  | N6—Zn2—N5                              | 83.6(3)    |
| O6 <sup>#2</sup> —Tb2—O5               | 104.24(19) | N6—Zn2—N4                              | 85.7(3)    |
| O4—Tb2—O5 <sup>#2</sup>                | 103.6(2)   | N5—Zn2—N4                              | 85.0(3)    |
| O4 <sup>#2</sup> —Tb2—O5 <sup>#2</sup> | 76.4(2)    | N6—Zn2—O5                              | 170.1(2)   |
| O6—Tb2—O5 <sup>#2</sup>                | 104.24(19) | N5—Zn2—O5                              | 91.5(3)    |
| O6 <sup>#2</sup> —Tb2—O5 <sup>#2</sup> | 75.76(19)  | N4—Zn2—O5                              | 102.5(2)   |
| O5—Tb2—O5 <sup>#2</sup>                | 180.000(1) | N6—Zn2—O6                              | 91.3(2)    |

Symmetry codes:(#1)  $-x+1, -y+1, -z$ ;(#2)  $-x, -y+1, -z+1$ .

**Table S4.** Selected bond lengths(Å) and angles(deg) for **4**

|        |          |        |          |
|--------|----------|--------|----------|
| Tb1—O3 | 2.268(4) | Tb2—O4 | 2.288(5) |
| Tb1—O2 | 2.272(4) | Tb2—O5 | 2.297(5) |

|                                        |            |                                        |            |
|----------------------------------------|------------|----------------------------------------|------------|
| Tb1—O1                                 | 2.282(4)   | Tb2—O4 <sup>#2</sup>                   | 2.288(5)   |
| Tb2—O6                                 | 2.279(5)   | Ni2—N4                                 | 2.059(7)   |
| Ni1—N2                                 | 2.070(5)   | Ni2—N6                                 | 2.074(6)   |
| Ni1—N3                                 | 2.074(5)   | Ni2—N5                                 | 2.075(5)   |
| Ni1—N1                                 | 2.084(5)   | Ni2—O5                                 | 2.113(5)   |
| Ni1—O1                                 | 2.105(4)   | Ni2—O6 <sup>#2</sup>                   | 2.124(4)   |
| Ni1—O3 <sup>#1</sup>                   | 2.128(4)   | Ni2—O4                                 | 2.125(5)   |
| Ni1—O2                                 | 2.138(4)   |                                        |            |
| O3 <sup>#1</sup> —Tb1—O3               | 180.00(17) | Ni2—O4—Tb2                             | 85.66(16)  |
| O3 <sup>#1</sup> —Tb1—O2               | 75.74(15)  | Ni2—O5—Tb2                             | 85.69(17)  |
| O3—Tb1—O2                              | 104.26(15) | N2—Ni1—N3                              | 85.2(2)    |
| O3 <sup>#1</sup> —Tb1—O2 <sup>#1</sup> | 104.26(15) | N2—Ni1—N1                              | 84.6(2)    |
| O3—Tb1—O2 <sup>#1</sup>                | 75.74(15)  | N3—Ni1—N1                              | 85.1(2)    |
| O2—Tb1—O2 <sup>#1</sup>                | 180.0(2)   | N2—Ni1—O1                              | 92.23(19)  |
| O3 <sup>#1</sup> —Tb1—O1               | 75.15(15)  | Ni1—O1—Tb1                             | 86.55(14)  |
| O3—Tb1—O1                              | 104.85(15) | Ni1—O2—Tb1                             | 86.02(15)  |
| O2—Tb1—O1                              | 74.53(15)  | Ni1 <sup>#1</sup> —O3—Tb1              | 86.36(14)  |
| O2 <sup>#1</sup> —Tb1—O1               | 105.47(15) | O2—Tb1—O1 <sup>#1</sup>                | 105.47(15) |
| O3 <sup>#1</sup> —Tb1—O1 <sup>#1</sup> | 104.85(15) | O2 <sup>#1</sup> —Tb1—O1 <sup>#1</sup> | 74.53(15)  |
| O3—Tb1—O1 <sup>#1</sup>                | 75.15(15)  | O1—Tb1—O1 <sup>#1</sup>                | 180.0      |
| N3—Ni1—O1                              | 101.75(18) | N3—Ni1—O3 <sup>#1</sup>                | 172.27(19) |
| N1—Ni1—O1                              | 172.22(19) | N2—Ni1—O3 <sup>#1</sup>                | 101.57(19) |
| N1—Ni1—O3 <sup>#1</sup>                | 91.73(18)  | N4—Ni2—N6                              | 85.0(3)    |
| O1—Ni1—O3 <sup>#1</sup>                | 81.93(16)  | N4—Ni2—N5                              | 85.7(2)    |
| N2—Ni1—O2                              | 172.18(19) | N6—Ni2—N5                              | 86.0(2)    |
| N3—Ni1—O2                              | 92.23(18)  | N4—Ni2—O5                              | 173.0(2)   |
| N1—Ni1—O2                              | 102.55(18) | N6—Ni2—O5                              | 92.0(2)    |
| O1—Ni1—O2                              | 81.07(16)  | N5—Ni2—O5                              | 100.3(2)   |
| O3 <sup>#1</sup> —Ni1—O2               | 81.57(16)  | N4—Ni2—O6 <sup>#2</sup>                | 92.9(2)    |
| O6—Tb2—O6 <sup>#2</sup>                | 180.0(2)   | N6—Ni2—O6 <sup>#2</sup>                | 101.7(2)   |
| O6—Tb2—O4 <sup>#2</sup>                | 75.01(17)  | N5—Ni2—O6 <sup>#2</sup>                | 172.0(2)   |
| O6 <sup>#2</sup> —Tb2—O4 <sup>#2</sup> | 104.99(17) | O5—Ni2—O6 <sup>#2</sup>                | 81.61(18)  |
| O6—Tb2—O4                              | 104.99(17) | N4—Ni2—O4                              | 99.9(2)    |
| O6 <sup>#2</sup> —Tb2—O4               | 75.01(17)  | N6—Ni2—O4                              | 174.0(2)   |
| O4 <sup>#2</sup> —Tb2—O4               | 180.00(8)  | N5—Ni2—O4                              | 90.8(2)    |
| O6—Tb2—O5 <sup>#2</sup>                | 74.45(17)  | O5—Ni2—O4                              | 83.61(19)  |
| O6 <sup>#2</sup> —Tb2—O5 <sup>#2</sup> | 105.55(17) | O6 <sup>#2</sup> —Ni2—O4               | 81.76(18)  |
| O4 <sup>#2</sup> —Tb2—O5 <sup>#2</sup> | 76.06(17)  | Ni2 <sup>#2</sup> —O6—Tb2              | 85.90(15)  |
| O4—Tb2—O5 <sup>#2</sup>                | 103.94(17) | O4—Tb2—O5                              | 76.06(17)  |
| O6—Tb2—O5                              | 105.55(17) | O5 <sup>#2</sup> —Tb2—O5               | 180.0(2)   |
| O6 <sup>#2</sup> —Tb2—O5               | 74.45(17)  | O4 <sup>#2</sup> —Tb2—O5               | 103.94(17) |

Symmetry codes:(#1) -x, -y+1, -z;(#2) -x+1, -y+1, -z+1.



**Table S5.** SHAPE analysis of the Tb/Zn/Ni ions in complex1–4

| Complex | Metal Ions | Label        | Shape                                   | Symmetry              | Distortion( $\tau$ ) |
|---------|------------|--------------|-----------------------------------------|-----------------------|----------------------|
| 1       | Tb         | HP-7         | Heptagon                                | D <sub>7h</sub>       | 32.986               |
|         |            | HPY-7        | Hexagonal pyramid                       | C <sub>6v</sub>       | 20.545               |
|         |            | PBPY-7       | Pentagonal bipyramid                    | D <sub>5h</sub>       | 8.399                |
|         |            | <b>COC-7</b> | <b>Capped octahedron</b>                | <b>C<sub>3v</sub></b> | <b>1.126</b>         |
|         |            | CTPR-7       | Capped trigonal prism                   | C <sub>2v</sub>       | 2.259                |
|         |            | JPBPY-7      | Johnson pentagonal bipyramid J13        | D <sub>5h</sub>       | 11.241               |
|         |            | JETPY-7      | Johnson elongated triangular pyramid J7 | C <sub>3v</sub>       | 13.69                |
| 2       | Tb         | HP-7         | Heptagon                                | D <sub>7h</sub>       | 34.195               |
|         |            | HPY-7        | Hexagonal pyramid                       | C <sub>6v</sub>       | 20.904               |
|         |            | PBPY-7       | Pentagonal bipyramid                    | D <sub>5h</sub>       | 9.059                |
|         |            | <b>COC-7</b> | <b>Capped octahedron</b>                | <b>C<sub>3v</sub></b> | <b>0.869</b>         |
|         |            | CTPR-7       | Capped trigonal prism                   | C <sub>2v</sub>       | 2.671                |
|         |            | JPBPY-7      | Johnson pentagonal bipyramid J13        | D <sub>5h</sub>       | 12.087               |
|         |            | JETPY-7      | Johnson elongated triangular pyramid J7 | C <sub>3v</sub>       | 13.708               |
| 3       | Tb         | HP-6         | Hexagon                                 | D <sub>6h</sub>       | 29.187               |
|         |            | PPY-6        | Pentagonal pyramid                      | C <sub>5v</sub>       | 29.09                |
|         |            | <b>OC-6</b>  | <b>Octahedron</b>                       | <b>O<sub>h</sub></b>  | <b>2.668</b>         |
|         |            | TPR-6        | Trigonal prism                          | D <sub>3h</sub>       | 14.294               |
|         |            | JPPY-6       | Johnson pentagonal pyramid J2           | C <sub>5v</sub>       | 31.802               |
| 3       | Zn         | HP-6         | Hexagon                                 | D <sub>6h</sub>       | 31.378               |
|         |            | PPY-6        | Pentagonal pyramid                      | C <sub>5v</sub>       | 24.742               |
|         |            | <b>OC-6</b>  | <b>Octahedron</b>                       | <b>O<sub>h</sub></b>  | <b>1.41</b>          |
|         |            | TPR-6        | Trigonal prism                          | D <sub>3h</sub>       | 9.703                |
|         |            | JPPY-6       | Johnson pentagonal pyramid J2           | C <sub>5v</sub>       | 28.359               |
| 4       | Tb         | HP-6         | Hexagon                                 | D <sub>6h</sub>       | 28.975               |
|         |            | PPY-6        | Pentagonal pyramid                      | C <sub>5v</sub>       | 29.181               |
|         |            | <b>OC-6</b>  | <b>Octahedron</b>                       | <b>O<sub>h</sub></b>  | <b>3.002</b>         |
|         |            | TPR-6        | Trigonal prism                          | D <sub>3h</sub>       | 14.291               |
|         |            | JPPY-6       | Johnson pentagonal pyramid J2           | C <sub>5v</sub>       | 31.880               |
| 4       | Ni         | HP-6         | Hexagon                                 | D <sub>6h</sub>       | 31.237               |
|         |            | PPY-6        | Pentagonal pyramid                      | C <sub>5v</sub>       | 25.958               |
|         |            | <b>OC-6</b>  | <b>Octahedron</b>                       | <b>O<sub>h</sub></b>  | <b>0.899</b>         |
|         |            | TPR-6        | Trigonal prism                          | D <sub>3h</sub>       | 11.354               |
|         |            | JPPY-6       | Johnson pentagonal pyramid J2           | C <sub>5v</sub>       | 29.523               |

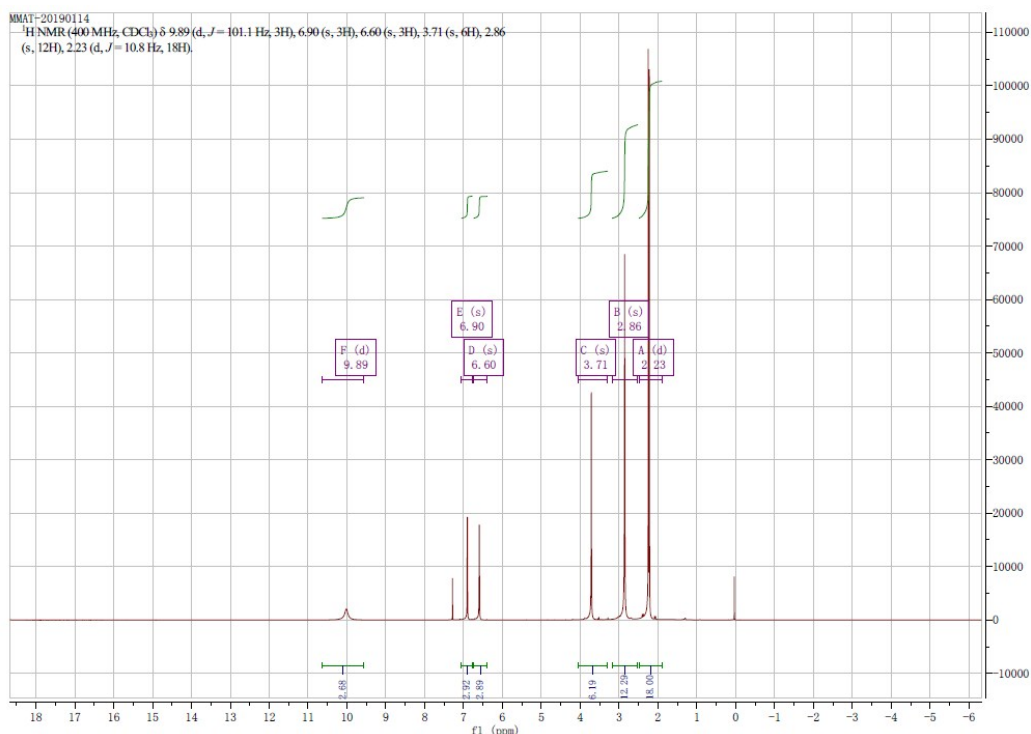

(a)

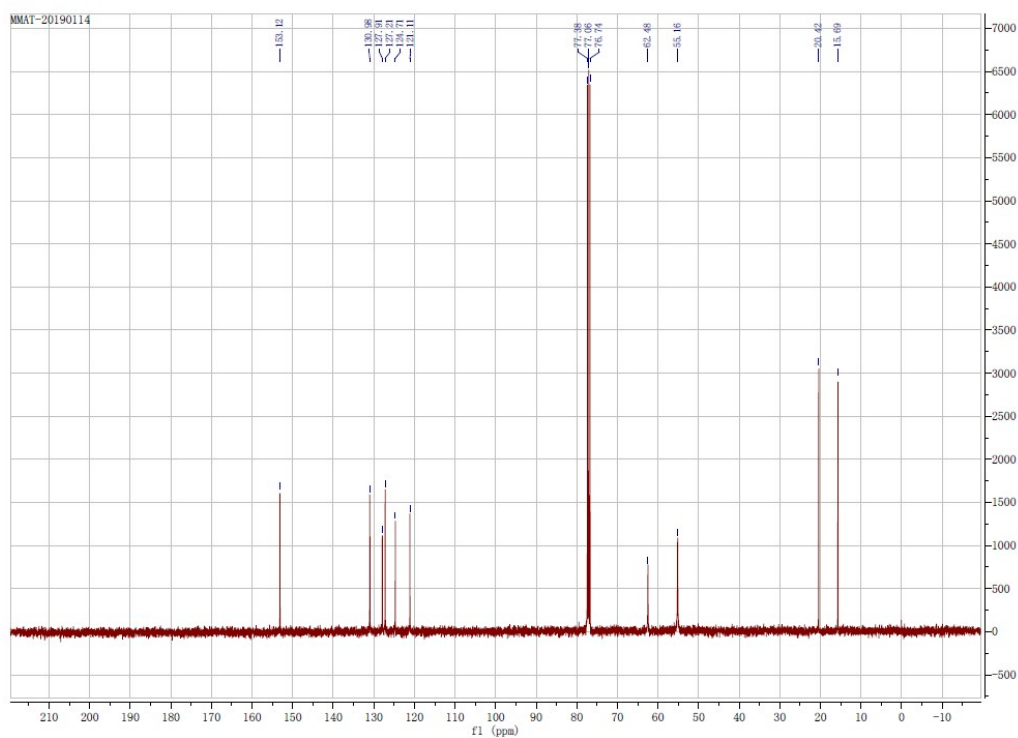

(b)

Fig. S1. (a) <sup>1</sup>H NMR (400 MHz, CDCl<sub>3</sub>) : δ 9.89 (d, J = 101.1 Hz, 3H), 6.90 (s, 3H), 6.60 (s, 3H), 3.71 (s, 6H), 2.86 (s, 12H), 2.23 (d, J = 10.8 Hz, 18H); (b) <sup>13</sup>C (<sup>1</sup>H) NMR (101 MHz, CDCl<sub>3</sub>): δ 15.69 (Me<sub>a</sub>), 20.42 (Me<sub>b</sub>), 55.16 (TACN, ring CH<sub>2</sub>), 62.48 (benzylic, CH<sub>2</sub>), 121.11, 124.71, 127.21, 127.91, 130.98, 153.13 (phenyl C's).



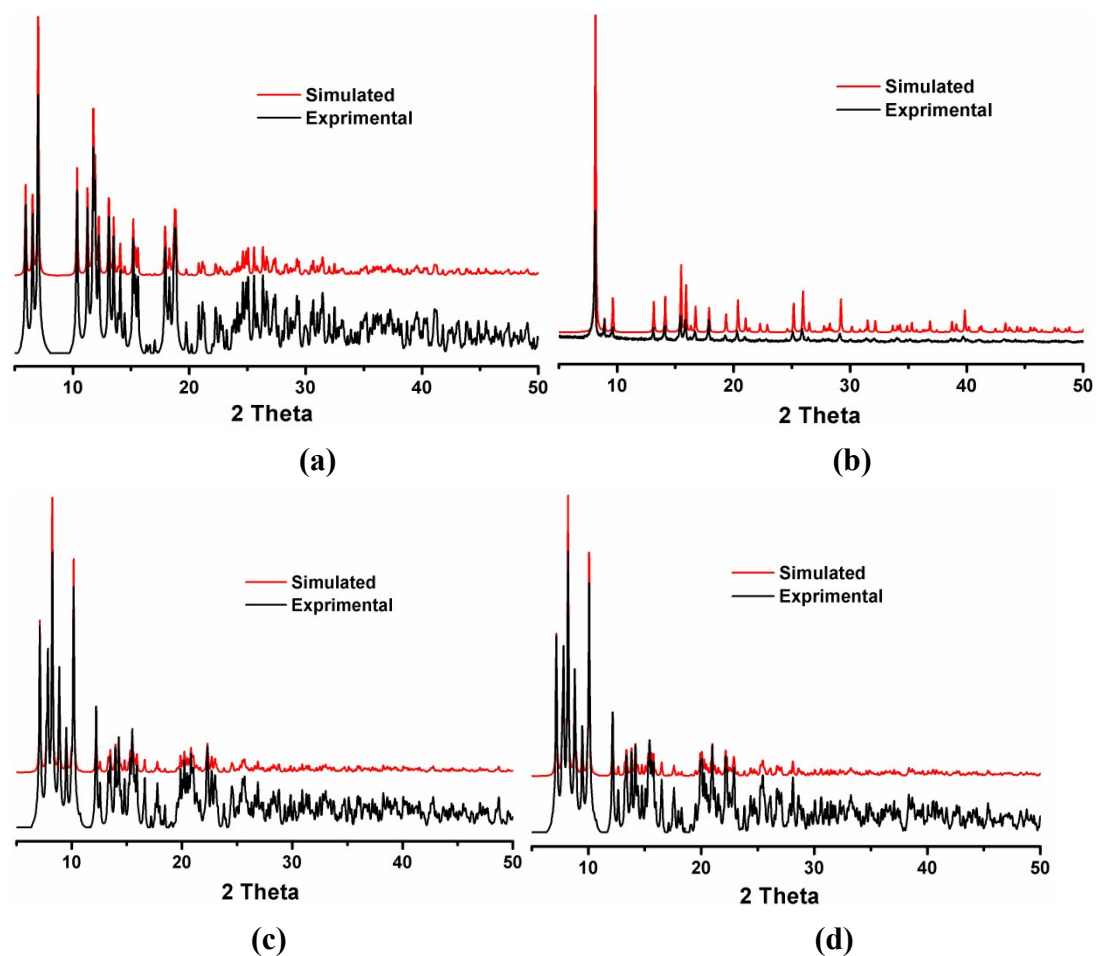

Fig. S2. The PXRD patterns of complexes 1 (a), 2 (b), 3 (c) and 4 (d).

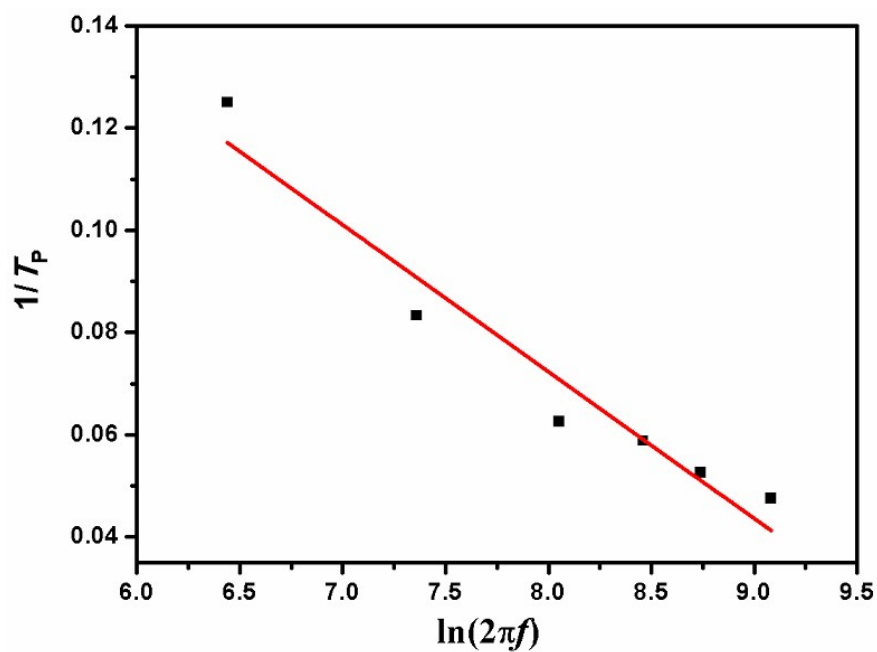

Fig. S3. The least-squares fit for 3 of the experimental data to the Arrhénius equation.

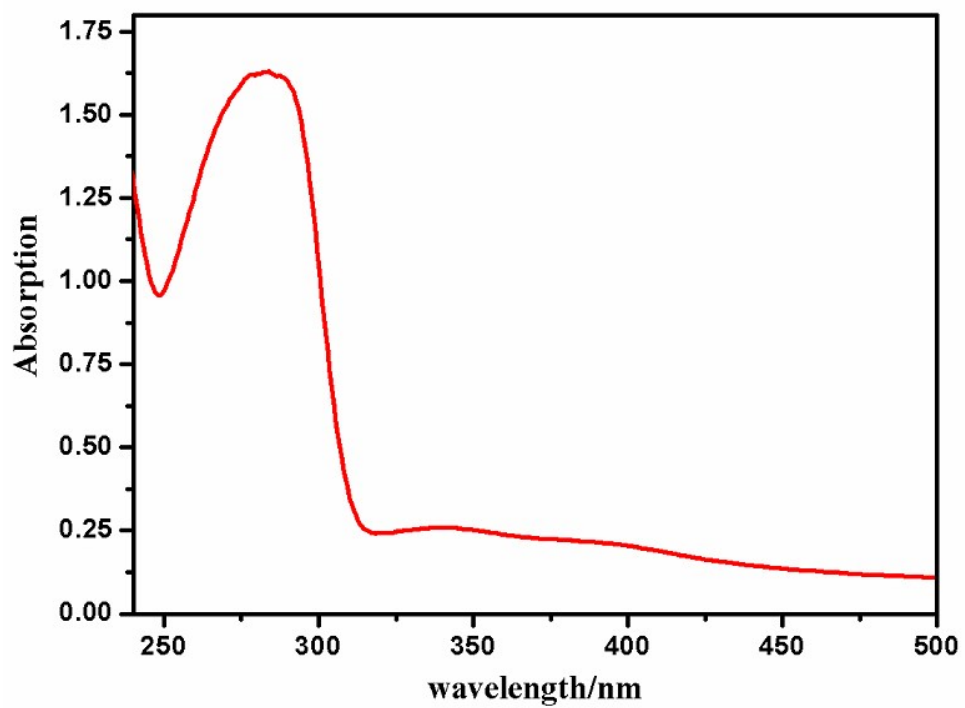

**Fig. S4.** The UV spectrum of H<sub>3</sub>L.
